# Supplementary material for: Enhancement of the p-channel performance of sulfur-bridged annulene through a donor–acceptor co-crystal approach
Source: Royal Society of Chemistry journal article supplement (doi:10.1039/c4tc01876a), 2014-09-03
Supplement: c4tc01876a1.pdf [file c4tc01876a1.pdf]

*Electronic Supplementary Information (ESI)*

## **Enhancement of the P-channel Performance of Sulfur-Bridged Annulene Through a Donor-Acceptor Co-crystal Approach**

**Jing Zhang,<sup>ab</sup> Guangyao Zhao,<sup>ab</sup> Yunke Qin,<sup>ab</sup> Jiahui Tan,<sup>ab</sup> Hua Geng,<sup>a</sup> Wei Xu,<sup>\*a</sup> Wenping Hu,<sup>\*a</sup> Zhigang Shuai<sup>\*c</sup> and Daoben Zhu<sup>\*a</sup>**

*a. Beijing National Laboratory for Molecular Science, Key Laboratory of Organic Solids, Institute of Chemistry, Chinese Academy of Sciences, Beijing 100190, China.*

*b. Graduate School of the Chinese Academy of Sciences, Beijing 100190, China.*

*c Chemistry Department, Tsinghua University, Beijing 100084.*

**\*Correspondence:** [wxu@iccas.ac.cn](mailto:wxu@iccas.ac.cn); [zhudb@iccas.ac.cn](mailto:zhudb@iccas.ac.cn)

### **Table of Contents**

**Figure S1.** UV-visible spectra of DPNDI, DPTTA-DPNDI and DPTTA in chlorobenzene. (S3)

**Figure S2.** The cocrystal anisotropy investigation. (S4)

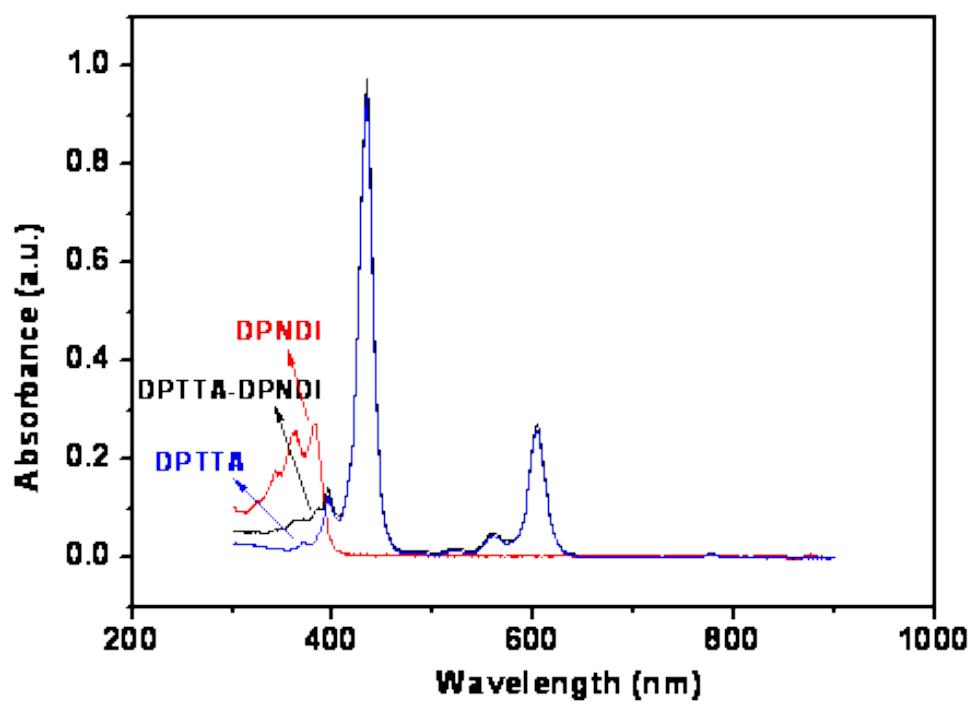

Figure S1. UV-visible spectra of DPNDI, DPTTA-DPNDI and DPTTA in chlorobenzene.

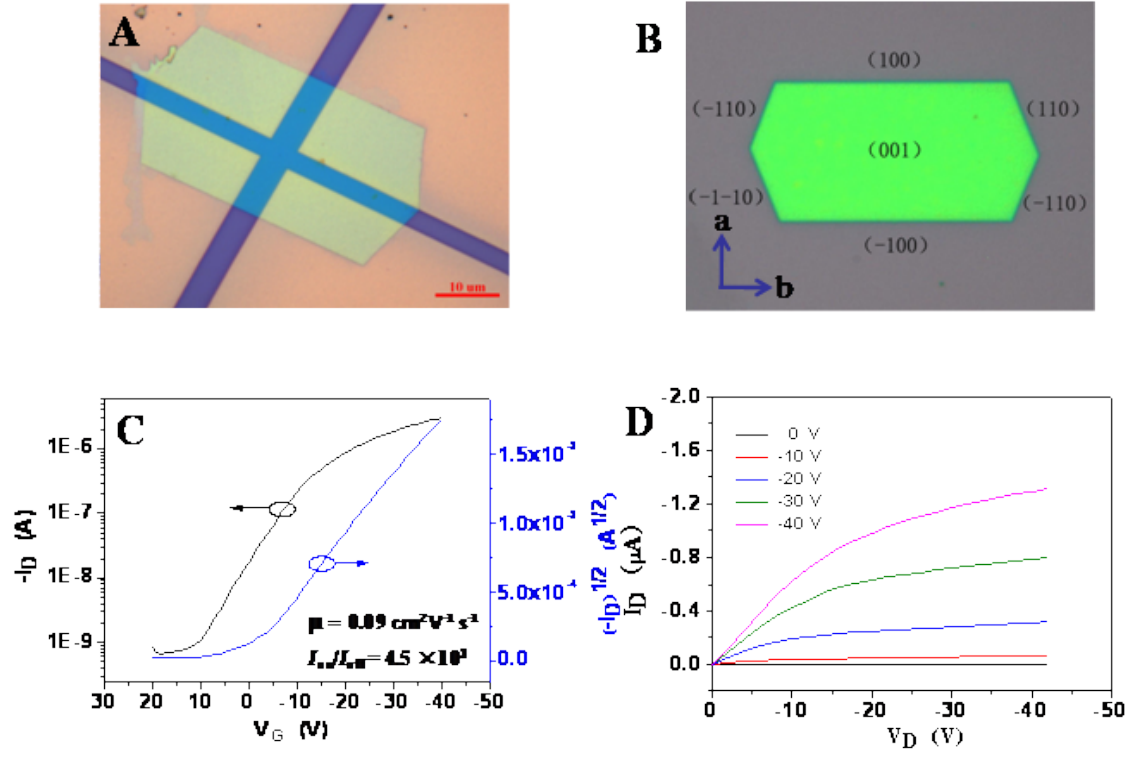

**Figure S2.** A) Optical image of a transistor with four electrodes to probe the charge transport along the a and b axis, B) the schematic diagram of the crystal with the facets indexed. C) a) transfer and b) output characteristics of the transistor along the a axis.
